# Supplementary material for: Symptom experience during the late reproductive stage and the menopausal transition: observations from the Women Living Better survey
Source: PubMed Central journal article supplement — Menopause. 2021 Jul 26;28(9):1012–25. doi: 10.1097/GME.0000000000001805 (PMC8549458; doi:10.1097/gme.0000000000001805), 2021-07-26
Supplement: menop-28-1012-s002.pdf [file menop-28-1012-s002.pdf]

## Supplemental Digital Content 2

**Table of Correlations of Age and Stage  
Controlling for Age with Symptom Burden (Pearson's r and partial correlation)**

| Symptom                   | Age and Burden <sup>a</sup> | Stage and Burden<br>Controlling for<br>Age <sup>a</sup> |
|---------------------------|-----------------------------|---------------------------------------------------------|
| Hot flashes               | .160                        | .238                                                    |
| Breast soreness           | -.152                       | -.124                                                   |
| Cramps                    | -.100                       | -.089 (p=.002)                                          |
| Skin dryness              | .094                        | NS                                                      |
| Itchiness                 | .089                        | NS                                                      |
| Joint/muscle<br>pain      | .078                        | NS                                                      |
| Joint/muscle<br>stiffness | .088                        | .093                                                    |
| Pain with sex             | .096                        | NS                                                      |
| Less lubrication          | .113                        | .123                                                    |
| Vaginal dryness           | .089                        | .169                                                    |

a p<.001
